# Supplementary material for: Using Multi-objective Optimization to Identify Dynamical Network Biomarkers as Early-warning Signals of Complex Diseases
Source: PubMed Central journal article supplement (PMC4764930; doi:10.1038/srep22023), 2016-02-24
Supplement: srep22023-s1.pdf [file srep22023-s1.pdf]

# Supplementary Materials

---

## Using Multi-objective Optimization to Identify Dynamical Network Biomarkers as Early-warning Signals of Complex Diseases

Fatemeh Vafaei<sup>1,2</sup>

<sup>1</sup>Charles Perkins Centre, University of Sydney, Sydney, Australia

<sup>2</sup>School of Mathematics and Statistics, University of Sydney, Sydney, Australia

[fatemeh.vafaei@sydney.edu.au](mailto:fatemeh.vafaei@sydney.edu.au)

### Table of Contents

|                                                                              |   |
|------------------------------------------------------------------------------|---|
| Supplementary Texts .....                                                    | 2 |
| Permutation test to assess the significance of a DNB's signal intensity..... | 2 |
| Supplementary Figures .....                                                  | 3 |
| Figure S1.....                                                               | 3 |
| Figure S2.....                                                               | 4 |
| Supplementary Tables .....                                                   | 5 |
| Table S1.....                                                                | 5 |
| Table S2.....                                                                | 6 |
| Table S3.....                                                                | 7 |
| Table S4.....                                                                | 8 |

## Supplementary Texts

### Permutation test to assess the significance of a DNB's signal intensity

In order to assess the significance of the elevation of a DNB composite index at the pre-disease time, a permutation test has been conducted for each of the compared methods. The test statistic is  $\Delta I = I_t - I_{t-1}$ , where  $t$  is the pre-disease time. For a DNB of size  $n$  predicted by a compared algorithm, the distribution of the test statistic under the null hypothesis is obtained by randomly generating a group of  $n$  genes from the gene pool (i.e., the set of all differentially expressed genes), and repeating this process for 1000 times. The test statistic is then computed for each of the "random DNBs" using the pre-disease time as predicted by the compared algorithm. The p-value is estimated as the fraction of random DNBs whose test statistic is equal or higher than the  $\Delta I$  of the DNB of the compared algorithm.

## Supplementary Figures

### Figure S1

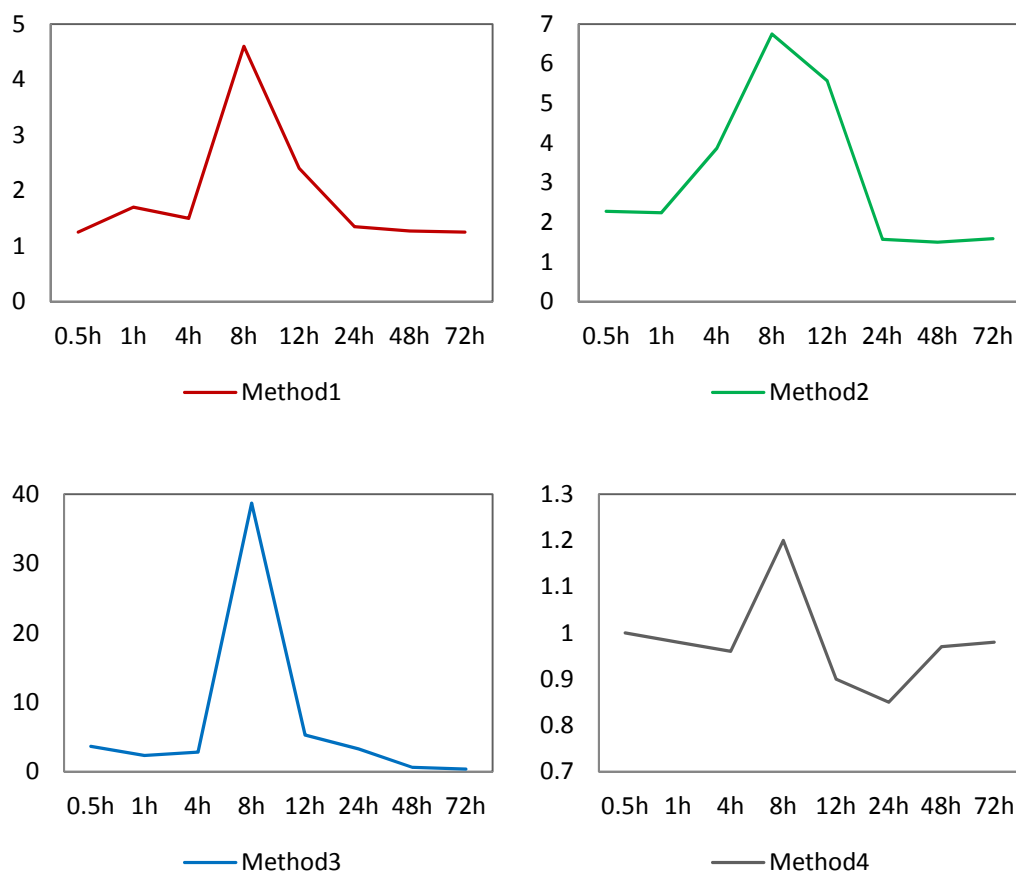

**Figure S1: Temporal behaviors of DNBs predicted by different methods in terms of the change of the corresponding composite indices over time; Method 1: [Chen *et al*, 2012], Method 2: [Yu *et al*, 2013], Method 3: [Zeng *et al*, 2014], Method 4: [Li *et al*, 2015]. Information for Method 1 and Method 4 were extracted from the original papers. Method 3 has provided the java source code of the proposed algorithm. The code was run on acute lung injury (ALI) data, and the identified modules were extracted for consequent analysis. Method 2 was reproduced for ALI database.**

**Figure S2**

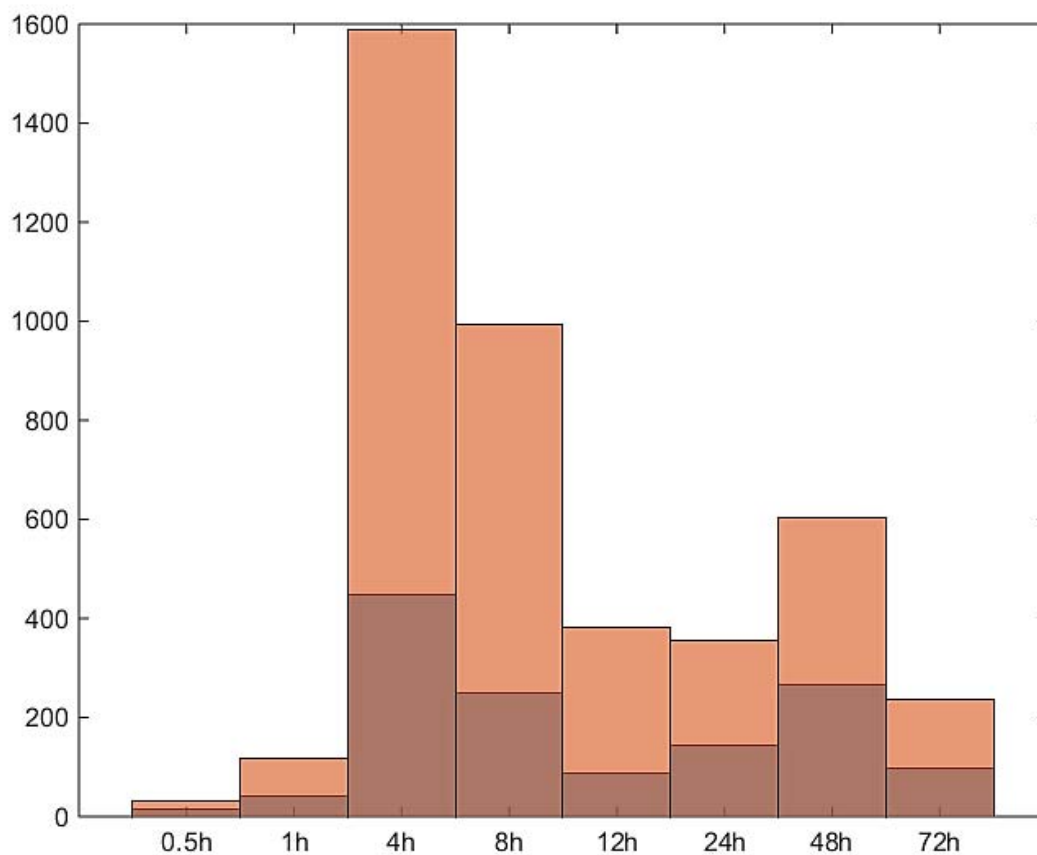

**Figure S2: Distribution of genes deregulated at different time-points.** Each bar of the histogram shows the number of genes whose deregulation commenced at the corresponding time. The significance is assessed according to the FDR q-value and the threshold is set to **0.05** in pale orange histogram and to **0.01** in dark orange histogram.

## Supplementary Tables

### Table S1

**Table S1: List of 89 genes included in the extended DNB (EDNB).**

| <b>Genes in Extended DNB</b> |          |         |                 |
|------------------------------|----------|---------|-----------------|
| ALDH3A1                      | ECT2     | LGALS1  | SHISA2          |
| ANLN                         | EGR1     | LGALS3  | SLC4A1          |
| APLNR                        | ERCC6L   | LTF     | SNCA            |
| ASF1B                        | FCER1G   | MAD2L1  | SOCS3           |
| AURKA                        | FKBP5    | MCM5    | SPAG5           |
| BID                          | FOS      | MELK    | SPC25           |
| BIRC5                        | GADD45G  | MKI67   | STEAP3          |
| CCNB1                        | HELLS    | MYC     | STIL            |
| CCNB2                        | HMGB2    | NCAPG2  | TACC3           |
| CCNF                         | HSP90AA1 | NUF2    | TGFBI           |
| CDC20                        | HSPA1B   | PBK     | TK1             |
| CDCA5                        | HSPA8    | PLK1    | TK1             |
| CDK1                         | HSPA9    | PMAIP1  | TNXB            |
| CDKN2C                       | HSPB1    | PRC1    | TOP2A           |
| CENPA                        | HSPD1    | RACGAP1 | TOP2A           |
| CEP55                        | HSPH1    | RAD51   | TPX2            |
| CHST15                       | JUN      | RRM2    | TRIP13          |
| CKS1B                        | KIF20A   | RTP3    | TTN             |
| CKS2                         | KIF23    | S100A4  | TUBA4A          |
| CLEC2D                       | KRT18    | S100A8  | UBE2C           |
| COL6A3                       | KRT8     | S100A9  | UHRF1           |
| CTSK                         | LCN2     | SHCBP1  | XDH, and ZBTB16 |

**Table S2****Table S2: List of 293 target genes (TGs) of the extended DNB significantly deregulated after time 4h.**

| <b>TGs de-regulated in t&gt;4h (FDR p-value &lt;0.05)</b> |         |         |         |         |          |         |
|-----------------------------------------------------------|---------|---------|---------|---------|----------|---------|
| ABCA1                                                     | CHRN1   | FUT1    | LZTR1   | NID1    | PSMD3    | SRF     |
| ABCB10                                                    | CLN3    | FXR1    | MAFF    | NME1    | PSMD5    | SRI     |
| ABCB6                                                     | CLU     | GADD45A | MAGOH   | NPM1    | PTGER2   | SRM     |
| ACE                                                       | CNPY2   | GALC    | MAN2A1  | NQO1    | PTGES3   | SRPR    |
| ACTR3                                                     | CNTN1   | GAPDH   | MAPRE2  | NR1D1   | PTGS2    | STOM    |
| ACYP2                                                     | COL1A1  | GCLC    | MBD1    | NR3C1   | PTOV1    | SYN2    |
| ADCY9                                                     | COL5A1  | GCLM    | MCCC2   | NRF1    | PTP4A1   | TBXA2R  |
| ADRB1                                                     | COPS2   | GDF15   | MCL1    | NTHL1   | PTPN6    | TFF1    |
| ALDH9A1                                                   | COPS3   | GJA1    | MCM3    | ODC1    | PTPRF    | TGFB1   |
| ALDOA                                                     | COX7A2L | GSS     | MDM2    | PA2G4   | RARA     | TGFB2   |
| AMD1                                                      | CR2     | GSTO1   | ME1     | PCF11   | RARB     | TGFB3   |
| AMPD3                                                     | CRADD   | HBEGF   | MEIS1   | PCMT1   | RBM3     | TGM1    |
| APP                                                       | CSTB    | HERPUD1 | MEN1    | PCNA    | RBM8A    | THBS1   |
| AREG                                                      | CXCR4   | HEY1    | MFNG    | PDE6D   | RFC2     | TIMP1   |
| ARF4                                                      | CYR61   | HIF1A   | MGEA5   | PDGFA   | RFX5     | TIMP2   |
| ASCL2                                                     | DBI     | HMOX1   | MGST1   | PDGFB   | RGS2     | TNC     |
| ATF3                                                      | DBP     | HNRNPA1 | MKKN1   | PDGFRB  | RNF4     | TOMM20  |
| ATF4                                                      | DDIT3   | HNRPDL  | MMP14   | PKD2    | RPL10    | TOP1    |
| ATP1A2                                                    | DDX1    | HOXA5   | MMP15   | PECAM1  | RPL15    | TPR     |
| ATP2A2                                                    | DGCR6   | HOXB2   | MMP19   | PKM2    | RPS6KA2  | TRIM25  |
| BAZ1B                                                     | DLEU2   | HSD11B2 | MMP2    | PLA2G4A | SARS     | TSC2    |
| BCL2                                                      | DPYSL3  | HSPA1A  | MMP3    | PLAT    | SARS2    | TSHB    |
| BCL3                                                      | E2F1    | HSPA8   | MMP8    | PLAUR   | SCNN1B   | TYK2    |
| BID                                                       | EAPP    | HSPD1   | MSN     | PLCB3   | SEC23B   | U2AF1   |
| BMP4                                                      | EDN1    | HSPE1   | MSR1    | PMAIP1  | SERPINE1 | UBA52   |
| BRD7                                                      | EGR1    | IER2    | MTCH1   | PMVK    | SERPINE2 | UBE2D3  |
| CAPZA1                                                    | EIF2S1  | IFNAR1  | MUC1    | POLA2   | SFTPA1   | UBE2G2  |
| CBS                                                       | EIF4A1  | IFRD2   | MUC5B   | POLE3   | SFTPD    | UCHL1   |
| CBX5                                                      | EIF4E   | ING1    | MYB     | PON1    | SIRT1    | USO1    |
| CCL2                                                      | ESD     | ISG20   | MYC     | POR     | SLC20A1  | USP11   |
| CCRL2                                                     | ETF1    | ITGA2   | MYCL1   | PPARG   | SLC31A1  | VAPA    |
| CCT5                                                      | ETS1    | ITGA5   | MYCT1   | PPP2CA  | SLC39A8  | VASP    |
| CCT7                                                      | ETS2    | JUN     | NAB2    | PRDX3   | SLC3A2   | VCAM1   |
| CCT8                                                      | F3      | JUNB    | NAP1L1  | PRDX6   | SLC9A3R2 | VCP     |
| CD14                                                      | FABP4   | KLK1B4  | NCBP2   | PREP    | SMAD4    | VEGFA   |
| CD82                                                      | FANCA   | LAIR1   | NCL     | PRKCSH  | SNRPB    | VHL     |
| CD9                                                       | FASN    | LAMA4   | NDRG1   | PRKDC   | SOD2     | VIM     |
| CDKN1A                                                    | FGFR4   | LAMP1   | NDUFB5  | PSAP    | SPAST    | WDR36   |
| CDKN2B                                                    | FLT1    | LAMP2   | NFAT5   | PSMA1   | SPIB     | XDH     |
| CEBPB                                                     | FOS     | LDLR    | NFE2L1  | PSMA5   | SPINT1   | ZFP36   |
| CEBPD                                                     | FOSL1   | LHB     | NFIL3   | PSMB5   | SPP1     | ZFP36L2 |
| CEBPZ                                                     | FUS     | LMNA    | NFKBIL1 | PSMD14  | SQSTM1   |         |

## Table S3

**Table S3: List of 61 genes in DisGeNet related to acute lung injury. Those genes which are among the deregulated TGs of the extended DNB are colored in red.**

| Genes related to acute lung injury in DisGeNet |        |          |
|------------------------------------------------|--------|----------|
| ACVR1                                          | GSTM1  | NOS2     |
| ADRA2A                                         | GSTP1  | P2RY12   |
| AGER                                           | GSTT1  | PECAM1   |
| ALB                                            | ICAM1  | PLA2G2A  |
| APOA1                                          | IFNG   | PLAU     |
| ASCL1                                          | IL10   | PPARG    |
| CAT                                            | IL13   | PTGS2    |
| CCL2                                           | IL18   | SCGB1A1  |
| CCL4L1                                         | IL1B   | SERPINE1 |
| CXCL3                                          | IL1RL1 | SOD3     |
| CXCL6                                          | IL1RN  | TFF1     |
| CYP1A1                                         | IL2    | TFF2     |
| EDN1                                           | IL6    | TGFB1    |
| EPHX2                                          | ITGB2  | TIRAP    |
| F2                                             | KDR    | TLR4     |
| FAS                                            | MMP7   | TNF      |
| FASLG                                          | MST1R  | TXN      |
| FCGR1A                                         | MTHFR  | VEGFA    |
| FCGR2B                                         | MYLK   | VIP      |
| GJA1                                           | NFE2L2 |          |
| GSR                                            | NOD2   |          |

**Table S4****Table S4: GO terms (corrected p-value < 0.01) enriched by the extended DNB using BiNGO tool.**

| GO-ID | corrected p-value | Description                               | Genes in test set                                                                                                                                                                                                                                                                                                                                                                                                                                                                                                          |
|-------|-------------------|-------------------------------------------|----------------------------------------------------------------------------------------------------------------------------------------------------------------------------------------------------------------------------------------------------------------------------------------------------------------------------------------------------------------------------------------------------------------------------------------------------------------------------------------------------------------------------|
| 51301 | 8.68E-29          | cell division                             | CKS1B, PRC1, AURKA, ANLN, CEP55, ZBTB16, SPC25, NCAPG2, TOP2A, CDCA5, HELLS, ERCC6L, CDK1, CCNF, TPX2, NUF2, BIRC5, CDC20, UBE2C, RACGAP1, MCM5, CCNB1, CCNB2, MAD2L1, PLK1, SPAG5                                                                                                                                                                                                                                                                                                                                         |
| 7049  | 7.83E-28          | cell cycle                                | STEAP3, CKS1B, PRC1, AURKA, ANLN, CEP55, SPC25, CDKN2C, NCAPG2, CDCA5, HELLS, ERCC6L, TRIP13, CDK1, MKI67, CCNF, TPX2, NUF2, CDC20, BIRC5, RACGAP1, UBE2C, TACC3, RAD51, CCNB1, UHRF1, CCNB2, MAD2L1, PLK1, SPAG5, CKS2                                                                                                                                                                                                                                                                                                    |
| 279   | 8.16E-28          | M phase                                   | CDK1, MKI67, CCNF, NUF2, TPX2, CDC20, BIRC5, AURKA, ANLN, CEP55, TACC3, UBE2C, RAD51, CCNB1, SPC25, CCNB2, MAD2L1, PLK1, NCAPG2, SPAG5, CKS2, CDCA5, HELLS, TRIP13, ERCC6L                                                                                                                                                                                                                                                                                                                                                 |
| 22403 | 1.32E-26          | cell cycle phase                          | CDK1, MKI67, CCNF, NUF2, TPX2, CDC20, BIRC5, AURKA, ANLN, CEP55, TACC3, UBE2C, RAD51, CCNB1, SPC25, CCNB2, MAD2L1, PLK1, NCAPG2, SPAG5, CKS2, CDCA5, HELLS, TRIP13, ERCC6L                                                                                                                                                                                                                                                                                                                                                 |
| 9987  | 3.93E-26          | cellular process                          | STEAP3, PRC1, SNCA, S100A9, AURKA, PMAIP1, TTN, HSPH1, FOS, CDKN2C, TGFBI, LTF, SLC4A1, TOP2A, MYC, CDCA5, EGR1, CDK1, HSP90AA1, SOCS3, CCNF, TPX2, PBK, TACC3, UBE2C, ECT2, MCM5, RAD51, UHRF1, KRT18, MAD2L1, SPAG5, JUN, RRM2, GADD45G, TUBA4A, MELK, BID, XDH, CKS1B, HMGB2, FKBP5, ANLN, HSPA1B, CEP55, ZBTB16, ALDH3A1, TK1, SPC25, CENPA, NCAPG2, KRT8, FCER1G, ASF1B, HELLS, HSPA8, TRIP13, ERCC6L, HSPA9, TNXB, MKI67, LGALS3, LGALS1, NUF2, CDC20, BIRC5, RACGAP1, CCNB1, LCN2, CCNB2, PLK1, CKS2, HSPD1, KIF20A |
| 6996  | 2.43E-25          | organelle organization                    | BID, HMGB2, S100A9, SNCA, AURKA, ANLN, PMAIP1, HSPA1B, CEP55, TTN, SPC25, NCAPG2, CENPA, KRT8, ASF1B, TOP2A, MYC, CDCA5, HELLS, ERCC6L, CDK1, CCNF, NUF2, TPX2, CDC20, BIRC5, TACC3, UBE2C, CCNB1, CCNB2, MAD2L1, PLK1, SPAG5, JUN                                                                                                                                                                                                                                                                                         |
| 22402 | 4.75E-25          | cell cycle process                        | CDK1, MKI67, CCNF, NUF2, TPX2, CDC20, BIRC5, AURKA, ANLN, CEP55, TACC3, UBE2C, RAD51, CCNB1, SPC25, CCNB2, MAD2L1, PLK1, NCAPG2, SPAG5, CKS2, CDCA5, HELLS, TRIP13, ERCC6L                                                                                                                                                                                                                                                                                                                                                 |
| 16043 | 6.19E-25          | cellular component organization           | BID, HMGB2, S100A9, SNCA, AURKA, ANLN, CEP55, PMAIP1, HSPA1B, TTN, SPC25, CENPA, NCAPG2, KRT8, TGFBI, FCER1G, ASF1B, TOP2A, MYC, CDCA5, HELLS, ERCC6L, CDK1, TNXB, LGALS3, CCNF, NUF2, TPX2, CDC20, BIRC5, TACC3, UBE2C, ECT2, CCNB1, LCN2, CCNB2, MAD2L1, PLK1, SPAG5, JUN, RRM2, TUBA4A                                                                                                                                                                                                                                  |
| 280   | 6.95E-24          | nuclear division                          | CDK1, CCNF, NUF2, TPX2, CDC20, BIRC5, AURKA, ANLN, CEP55, UBE2C, CCNB1, SPC25, CCNB2, MAD2L1, PLK1, SPAG5, NCAPG2, CDCA5, HELLS, ERCC6L                                                                                                                                                                                                                                                                                                                                                                                    |
| 7067  | 6.95E-24          | mitosis                                   | CDK1, CCNF, NUF2, TPX2, CDC20, BIRC5, AURKA, ANLN, CEP55, UBE2C, CCNB1, SPC25, CCNB2, MAD2L1, PLK1, SPAG5, NCAPG2, CDCA5, HELLS, ERCC6L                                                                                                                                                                                                                                                                                                                                                                                    |
| 87    | 7.03E-24          | M phase of mitotic cell cycle             | CDK1, CCNF, NUF2, TPX2, CDC20, BIRC5, AURKA, ANLN, CEP55, UBE2C, CCNB1, SPC25, CCNB2, MAD2L1, PLK1, SPAG5, NCAPG2, CDCA5, HELLS, ERCC6L                                                                                                                                                                                                                                                                                                                                                                                    |
| 48285 | 8.86E-24          | organelle fission                         | CDK1, CCNF, NUF2, TPX2, CDC20, BIRC5, AURKA, ANLN, CEP55, UBE2C, CCNB1, SPC25, CCNB2, MAD2L1, PLK1, SPAG5, NCAPG2, CDCA5, HELLS, ERCC6L                                                                                                                                                                                                                                                                                                                                                                                    |
| 278   | 3.68E-22          | mitotic cell cycle                        | CDK1, CCNF, NUF2, TPX2, CDC20, BIRC5, AURKA, ANLN, CEP55, UBE2C, CCNB1, SPC25, CCNB2, MAD2L1, PLK1, SPAG5, NCAPG2, CDCA5, HELLS, ERCC6L                                                                                                                                                                                                                                                                                                                                                                                    |
| 48522 | 2.20E-10          | positive regulation of cellular process   | BID, STEAP3, EGR1, CDK1, HMGB2, HSP90AA1, SOCS3, LGALS1, SNCA, TPX2, CDC20, BIRC5, ZBTB16, PMAIP1, ALDH3A1, RAD51, CCNB1, LCN2, FOS, RRM2, JUN, FCER1G, HSPD1, MYC, TOP2A                                                                                                                                                                                                                                                                                                                                                  |
| 32502 | 2.77E-10          | developmental process                     | XDH, STIL, HMGB2, ZBTB16, TTN, FOS, SHISA2, NCAPG2, KRT8, TOP2A, MYC, HELLS, TRIP13, EGR1, CDK1, HSP90AA1, LGALS3, SOCS3, LGALS1, CCNF, TPX2, CDC20, BIRC5, RACGAP1, TACC3, ECT2, RAD51, CCNB1, UHRF1, CCNB2, JUN, GADD45G                                                                                                                                                                                                                                                                                                 |
| 48518 | 4.06E-10          | positive regulation of biological process | STEAP3, BID, HMGB2, SNCA, PMAIP1, HSPA1B, ZBTB16, ALDH3A1, FOS, FCER1G, TOP2A, MYC, EGR1, CDK1, HSP90AA1, SOCS3, LGALS1, TPX2, BIRC5, CDC20, RAD51, CCNB1, LCN2, JUN, RRM2, HSPD1                                                                                                                                                                                                                                                                                                                                          |
| 65007 | 4.06E-10          | biological regulation                     | STEAP3, STIL, SNCA, S100A9, PMAIP1, FOS, CDKN2C, LTF, MYC, TOP2A, EGR1, CDK1, HSP90AA1, SOCS3, TPX2, UBE2C, TACC3, ECT2, MCM5, RAD51, CTSK, UHRF1, MAD2L1, KRT18, JUN, RRM2, GADD45G, BID, XDH, HMGB2, HSPA1B, ZBTB16, ALDH3A1, APLNR, KRT8, CLEC2D, FCER1G, ASF1B, HSPA8, HELLS, TNXB, LGALS1, NUF2, BIRC5, CDC20, RACGAP1, LCN2, CCNB1, CCNB2, HSPD1                                                                                                                                                                     |
| 7275  | 1.25E-09          | multicellular organismal development      | XDH, STIL, HMGB2, ZBTB16, TTN, FOS, SHISA2, NCAPG2, KRT8, TOP2A, MYC, HELLS, EGR1, CDK1, HSP90AA1, LGALS3, SOCS3, LGALS1, CCNF, TPX2, CDC20, BIRC5, RACGAP1, TACC3, RAD51, CCNB1, UHRF1, CCNB2, JUN, GADD45G                                                                                                                                                                                                                                                                                                               |

Table continues to the next page.



| GO-ID | corrected p-value | Description                                  | Genes in test set                                                                                                                                                                                                                                                                                                              |
|-------|-------------------|----------------------------------------------|--------------------------------------------------------------------------------------------------------------------------------------------------------------------------------------------------------------------------------------------------------------------------------------------------------------------------------|
| 48856 | 2.27E-09          | anatomical structure development             | XDH, STIL, HMGB2, ZBTB16, TTN, FOS, NCAPG2, KRT8, MYC, HELLS, TRIP13, EGR1, CDK1, HSP90AA1, LGALS3, SOCS3, LGALS1, CCNF, TPX2, CDC20, RACGAP1, TACC3, ECT2, RAD51, CCNB1, CCNB2, JUN, GADD45G                                                                                                                                  |
| 50794 | 9.76E-09          | regulation of cellular process               | XDH, BID, STEAP3, STIL, HMGB2, S100A9, SNCA, ZBTB16, HSPA1B, PMAIP1, ALDH3A1, APLNR, FOS, CDKN2C, KRT8, CLEC2D, FCER1G, ASF1B, TOP2A, MYC, HELLS, HSPA8, EGR1, CDK1, TNXB, HSP90AA1, SOCS3, LGALS1, TPX2, CDC20, BIRC5, RACGAP1, TACC3, ECT2, MCM5, RAD51, CCNB1, LCN2, UHRF1, KRT18, MAD2L1, JUN, RRM2, GADD45G, HSPD1        |
| 50896 | 1.01E-08          | response to stimulus                         | XDH, HMGB2, S100A8, S100A9, SNCA, PMAIP1, HSPA1B, ALDH3A1, FOS, HSPH1, KRT8, CLEC2D, FCER1G, MYC, HSPA8, TRIP13, HSPA9, EGR1, CDK1, HSP90AA1, TACC3, RAD51, LCN2, UHRF1, JUN, GADD45G, HSPB1, HSPD1                                                                                                                            |
| 50789 | 1.20E-08          | regulation of biological process             | XDH, BID, STEAP3, STIL, HMGB2, S100A9, SNCA, ZBTB16, HSPA1B, PMAIP1, ALDH3A1, APLNR, FOS, CDKN2C, KRT8, CLEC2D, FCER1G, ASF1B, TOP2A, MYC, HELLS, HSPA8, EGR1, CDK1, TNXB, HSP90AA1, SOCS3, LGALS1, TPX2, CDC20, BIRC5, RACGAP1, TACC3, UBE2C, ECT2, MCM5, RAD51, CCNB1, LCN2, UHRF1, KRT18, MAD2L1, JUN, RRM2, GADD45G, HSPD1 |
| 6950  | 1.31E-08          | response to stress                           | CDK1, HSP90AA1, SNCA, PMAIP1, HSPA1B, TACC3, RAD51, ALDH3A1, LCN2, HSPH1, UHRF1, JUN, KRT8, CLEC2D, FCER1G, HSPB1, HSPD1, HSPA8, TRIP13, HSPA9                                                                                                                                                                                 |
| 42981 | 1.91E-07          | regulation of apoptosis                      | STEAP3, BID, STIL, SNCA, BIRC5, PMAIP1, HSPA1B, ZBTB16, RAD51, JUN, FCER1G, HSPD1, MYC, HELLS                                                                                                                                                                                                                                  |
| 43067 | 2.19E-07          | regulation of programmed cell death          | STEAP3, BID, STIL, SNCA, BIRC5, PMAIP1, HSPA1B, ZBTB16, RAD51, JUN, FCER1G, HSPD1, MYC, HELLS                                                                                                                                                                                                                                  |
| 10941 | 2.71E-07          | regulation of cell death                     | STEAP3, BID, STIL, SNCA, BIRC5, PMAIP1, HSPA1B, ZBTB16, RAD51, JUN, FCER1G, HSPD1, MYC, HELLS                                                                                                                                                                                                                                  |
| 22607 | 2.76E-07          | cellular component assembly                  | CDK1, TNXB, TPX2, TTN, CCNB1, LCN2, CENPA, RRM2, KRT8, TUBA4A, ASF1B, MYC, HELLS                                                                                                                                                                                                                                               |
| 32501 | 3.53E-07          | multicellular organismal process             | XDH, STIL, HMGB2, SNCA, ZBTB16, TTN, FOS, APLNR, SHISA2, NCAPG2, KRT8, TOP2A, MYC, HELLS, TRIP13, EGR1, CDK1, TNXB, HSP90AA1, LGALS3, SOCS3, LGALS1, CCNF, TPX2, CDC20, BIRC5, RACGAP1, TACC3, RAD51, CCNB1, UHRF1, CTSK, CCNB2, JUN, GADD45G                                                                                  |
| 42221 | 4.31E-07          | response to chemical stimulus                | EGR1, XDH, CDK1, HMGB2, HSP90AA1, S100A8, SNCA, S100A9, HSPA1B, ALDH3A1, LCN2, FOS, JUN, KRT8, FCER1G, HSPD1, MYC                                                                                                                                                                                                              |
| 51716 | 4.33E-07          | cellular response to stimulus                | EGR1, CDK1, SNCA, S100A9, PMAIP1, HSPA1B, RAD51, LCN2, FOS, UHRF1, JUN, FCER1G, MYC, TRIP13                                                                                                                                                                                                                                    |
| 48523 | 7.58E-07          | negative regulation of cellular process      | EGR1, STIL, SOCS3, LGALS1, SNCA, BIRC5, PMAIP1, HSPA1B, ZBTB16, RAD51, CCNB1, MAD2L1, CDKN2C, JUN, CLEC2D, FCER1G, HSPD1, MYC, HELLS                                                                                                                                                                                           |
| 48731 | 8.69E-07          | system development                           | XDH, EGR1, STIL, CDK1, HMGB2, HSP90AA1, LGALS3, SOCS3, LGALS1, CCNF, CDC20, ZBTB16, RACGAP1, TTN, TACC3, RAD51, FOS, CCNB2, JUN, KRT8, GADD45G, MYC, HELLS                                                                                                                                                                     |
| 48519 | 8.79E-07          | negative regulation of biological process    | EGR1, STIL, SOCS3, LGALS1, SNCA, BIRC5, ZBTB16, PMAIP1, HSPA1B, TACC3, RAD51, CCNB1, MAD2L1, CDKN2C, JUN, CLEC2D, FCER1G, HSPD1, MYC, HELLS                                                                                                                                                                                    |
| 51726 | 1.05E-06          | regulation of cell cycle                     | CDK1, MAD2L1, JUN, GADD45G, TPX2, BIRC5, TACC3, MYC, HSPA8                                                                                                                                                                                                                                                                     |
| 44085 | 1.48E-06          | cellular component biogenesis                | CDK1, TNXB, TPX2, TTN, CCNB1, LCN2, CENPA, RRM2, KRT8, TUBA4A, ASF1B, MYC, HELLS                                                                                                                                                                                                                                               |
| 6323  | 1.81E-06          | DNA packaging                                | CDK1, CENPA, NCAPG2, ASF1B, TOP2A, HELLS                                                                                                                                                                                                                                                                                       |
| 48869 | 2.42E-06          | cellular developmental process               | EGR1, HMGB2, HSP90AA1, LGALS3, SOCS3, LGALS1, TPX2, CDC20, ZBTB16, RACGAP1, TTN, TACC3, ECT2, RAD51, CCNB1, JUN, KRT8, GADD45G, HELLS, TRIP13                                                                                                                                                                                  |
| 9790  | 2.77E-06          | embryonic development                        | CCNB1, STIL, CCNB2, NCAPG2, SOCS3, KRT8, BIRC5, ZBTB16, RACGAP1, TTN, TOP2A, MYC, RAD51                                                                                                                                                                                                                                        |
| 71103 | 3.74E-06          | DNA conformation change                      | CDK1, CENPA, NCAPG2, ASF1B, TOP2A, HELLS                                                                                                                                                                                                                                                                                       |
| 6259  | 5.03E-06          | DNA metabolic process                        | UHRF1, RRM2, HSPA1B, TOP2A, MYC, HELLS, MCM5, TRIP13, TK1, RAD51                                                                                                                                                                                                                                                               |
| 43066 | 6.41E-06          | negative regulation of apoptosis             | STIL, SNCA, FCER1G, BIRC5, HSPD1, HSPA1B, MYC, HELLS, RAD51                                                                                                                                                                                                                                                                    |
| 1836  | 6.93E-06          | release of cytochrome c from mitochondria    | BID, JUN, PMAIP1, MYC                                                                                                                                                                                                                                                                                                          |
| 43069 | 6.93E-06          | negative regulation of programmed cell death | STIL, SNCA, FCER1G, BIRC5, HSPD1, HSPA1B, MYC, HELLS, RAD51                                                                                                                                                                                                                                                                    |

Table continues to the next page.

| GO-ID | corrected p-value | Description                                           | Genes in test set                                                                                                                                                                                     |
|-------|-------------------|-------------------------------------------------------|-------------------------------------------------------------------------------------------------------------------------------------------------------------------------------------------------------|
| 30154 | 6.93E-06          | cell differentiation                                  | EGR1, HMGB2, HSP90AA1, LGALS3, SOCS3, LGALS1, TPX2, CDC20, ZBTB16, RACGAP1, TTN, TACC3, RAD51, CCNB1, JUN, GADD45G, KRT8, HELLS, TRIP13                                                               |
| 51789 | 7.98E-06          | response to protein stimulus                          | EGR1, FOS, HSP90AA1, HSPD1, HSPA1B, MYC                                                                                                                                                               |
| 60548 | 8.60E-06          | negative regulation of cell death                     | STIL, SNCA, FCER1G, BIRC5, HSPD1, HSPA1B, MYC, HELLS, RAD51                                                                                                                                           |
| 51239 | 9.55E-06          | regulation of multicellular organismal process        | EGR1, XDH, CDK1, HSP90AA1, LGALS1, SNCA, CDC20, HSPA1B, RAD51, CCNB1, JUN, CLEC2D, FCER1G, HSPD1, MYC                                                                                                 |
| 6915  | 2.63E-05          | apoptosis                                             | BID, STEAP3, KRT18, JUN, KRT8, GADD45G, TPX2, BIRC5, PMAIP1, MYC                                                                                                                                      |
| 8637  | 2.66E-05          | apoptotic mitochondrial changes                       | BID, JUN, PMAIP1, MYC                                                                                                                                                                                 |
| 6457  | 2.79E-05          | protein folding                                       | HSPH1, HSP90AA1, FKBP5, HSPD1, HSPA8, HSPA9                                                                                                                                                           |
| 12501 | 2.88E-05          | programmed cell death                                 | BID, STEAP3, KRT18, JUN, KRT8, GADD45G, TPX2, BIRC5, PMAIP1, MYC                                                                                                                                      |
| 1701  | 3.76E-05          | in utero embryonic development                        | CCNB1, STIL, CCNB2, NCAPG2, SOCS3, KRT8, TTN, RAD51                                                                                                                                                   |
| 65003 | 3.76E-05          | macromolecular complex assembly                       | CCNB1, LCN2, CDK1, CENPA, RRM2, TUBA4A, ASF1B, MYC, HELLS                                                                                                                                             |
| 44260 | 4.68E-05          | cellular macromolecule metabolic process              | FKBP5, AURKA, HSPA1B, TK1, FOS, HSPH1, ASF1B, TOP2A, MYC, HSPA8, HELLS, TRIP13, HSPA9, EGR1, CDK1, HSP90AA1, PBK, UBE2C, MCM5, RAD51, CCNB1, UHRF1, PLK1, JUN, RRM2, GADD45G, HSPD1, MELK             |
| 43170 | 4.92E-05          | macromolecule metabolic process                       | FKBP5, AURKA, HSPA1B, TK1, FOS, HSPH1, ASF1B, TOP2A, MYC, HSPA8, HELLS, TRIP13, HSPA9, EGR1, CDK1, TNXB, HSP90AA1, PBK, UBE2C, MCM5, RAD51, CCNB1, UHRF1, CTSK, PLK1, JUN, RRM2, GADD45G, HSPD1, MELK |
| 8219  | 5.83E-05          | cell death                                            | BID, STEAP3, KRT18, JUN, KRT8, GADD45G, TPX2, BIRC5, PMAIP1, MYC                                                                                                                                      |
| 43933 | 6.34E-05          | macromolecular complex subunit organization           | CCNB1, LCN2, CDK1, CENPA, RRM2, TUBA4A, ASF1B, MYC, HELLS                                                                                                                                             |
| 16265 | 6.77E-05          | death                                                 | BID, STEAP3, KRT18, JUN, KRT8, GADD45G, TPX2, BIRC5, PMAIP1, MYC                                                                                                                                      |
| 33554 | 8.99E-05          | cellular response to stress                           | LCN2, CDK1, UHRF1, JUN, SNCA, HSPA1B, PMAIP1, TRIP13, RAD51                                                                                                                                           |
| 51128 | 9.70E-05          | regulation of cellular component organization         | CCNB1, LCN2, MAD2L1, HSP90AA1, LGALS1, S100A9, TPX2, FCER1G, CDC20                                                                                                                                    |
| 51085 | 1.30E-04          | chaperone mediated protein folding requiring cofactor | HSPH1, HSPD1, HSPA8                                                                                                                                                                                   |
| 7005  | 1.55E-04          | mitochondrion organization                            | BID, JUN, SNCA, PMAIP1, MYC                                                                                                                                                                           |
| 61077 | 1.60E-04          | chaperone-mediated protein folding                    | HSPH1, HSPD1, HSPA8                                                                                                                                                                                   |
| 7017  | 1.65E-04          | microtubule-based process                             | NUF2, TPX2, TUBA4A, BIRC5, TACC3, KIF20A                                                                                                                                                              |
| 51276 | 1.67E-04          | chromosome organization                               | CDK1, MAD2L1, CENPA, NCAPG2, HSPA1B, ASF1B, TOP2A, HELLS                                                                                                                                              |
| 7126  | 1.67E-04          | meiosis                                               | MKI67, PLK1, CKS2, TRIP13, RAD51                                                                                                                                                                      |
| 51327 | 1.67E-04          | M phase of meiotic cell cycle                         | MKI67, PLK1, CKS2, TRIP13, RAD51                                                                                                                                                                      |
| 51321 | 1.73E-04          | meiotic cell cycle                                    | MKI67, PLK1, CKS2, TRIP13, RAD51                                                                                                                                                                      |
| 6458  | 1.79E-04          | 'de novo' protein folding                             | HSPH1, HSPD1, HSPA8                                                                                                                                                                                   |
| 51084 | 1.79E-04          | 'de novo' posttranslational protein folding           | HSPH1, HSPD1, HSPA8                                                                                                                                                                                   |
| 6916  | 1.83E-04          | anti-apoptosis                                        | BIRC5, HSPD1, HSPA1B, MYC, HELLS                                                                                                                                                                      |
| 7059  | 2.26E-04          | chromosome segregation                                | MAD2L1, NUF2, BIRC5, TOP2A                                                                                                                                                                            |
| 7281  | 2.44E-04          | germ cell development                                 | CCNB1, HMGB2, TPX2, ZBTB16, TRIP13                                                                                                                                                                    |

Table continues to the next page.

| GO-ID | corrected p-value | Description                                                | Genes in test set                                                                                                                                                                                                                      |
|-------|-------------------|------------------------------------------------------------|----------------------------------------------------------------------------------------------------------------------------------------------------------------------------------------------------------------------------------------|
| 50793 | 2.44E-04          | regulation of developmental process                        | CCNB1, XDH, CDK1, HSP90AA1, SOCS3, LGALS1, JUN, CLEC2D, CDC20, MYC, RAD51                                                                                                                                                              |
| 30261 | 2.49E-04          | chromosome condensation                                    | CDK1, NCAPG2, TOP2A                                                                                                                                                                                                                    |
| 44237 | 2.57E-04          | cellular metabolic process                                 | XDH, FKBP5, SNCA, AURKA, HSPA1B, ALDH3A1, TK1, FOS, HSPH1, ASF1B, TOP2A, MYC, HELLS, HSPA8, TRIP13, HSPA9, EGR1, CDK1, TNXB, HSP90AA1, PBK, UBE2C, MCM5, RAD51, CCNB1, UHRF1, PLK1, JUN, RRM2, GADD45G, HSPD1, MELK                    |
| 43523 | 2.80E-04          | regulation of neuron apoptosis                             | JUN, SNCA, BIRC5, PMAIP1, RAD51                                                                                                                                                                                                        |
| 910   | 2.87E-04          | cytokinesis                                                | PRC1, PLK1, ANLN                                                                                                                                                                                                                       |
| 19222 | 2.94E-04          | regulation of metabolic process                            | EGR1, CDK1, HMGB2, TNXB, HSP90AA1, SOCS3, SNCA, S100A9, TPX2, ZBTB16, UBE2C, MCM5, CCNB1, LCN2, FOS, UHRF1, JUN, GADD45G, ASF1B, MYC, TOP2A, HELLS                                                                                     |
| 42127 | 3.20E-04          | regulation of cell proliferation                           | CCNB1, CDK1, CDKN2C, RRM2, JUN, CDC20, ZBTB16, PMAIP1, MYC, ALDH3A1                                                                                                                                                                    |
| 10033 | 3.25E-04          | response to organic substance                              | EGR1, CDK1, FOS, HMGB2, HSP90AA1, SNCA, HSPD1, HSPA1B, MYC, ALDH3A1                                                                                                                                                                    |
| 42493 | 3.25E-04          | response to drug                                           | LCN2, FOS, JUN, SNCA, ALDH3A1                                                                                                                                                                                                          |
| 7010  | 3.34E-04          | cytoskeleton organization                                  | KRT8, S100A9, NUF2, TPX2, BIRC5, TACC3, TTN                                                                                                                                                                                            |
| 60255 | 3.40E-04          | regulation of macromolecule metabolic process              | EGR1, CDK1, HMGB2, TNXB, SOCS3, SNCA, S100A9, TPX2, ZBTB16, UBE2C, MCM5, CCNB1, LCN2, FOS, UHRF1, JUN, ASF1B, MYC, TOP2A, HELLS                                                                                                        |
| 7006  | 3.66E-04          | mitochondrial membrane organization                        | BID, SNCA, PMAIP1                                                                                                                                                                                                                      |
| 44238 | 5.16E-04          | primary metabolic process                                  | XDH, FKBP5, SNCA, AURKA, HSPA1B, TK1, FOS, HSPH1, ASF1B, TOP2A, MYC, HELLS, HSPA8, TRIP13, HSPA9, EGR1, CDK1, TNXB, HSP90AA1, PBK, UBE2C, MCM5, RAD51, CCNB1, UHRF1, CTSK, PLK1, JUN, RRM2, GADD45G, HSPD1, MELK                       |
| 43009 | 6.02E-04          | chordate embryonic development                             | CCNB1, STIL, CCNB2, NCAPG2, SOCS3, KRT8, TTN, RAD51                                                                                                                                                                                    |
| 8152  | 6.02E-04          | metabolic process                                          | STEAP3, XDH, FKBP5, SNCA, AURKA, HSPA1B, TK1, ALDH3A1, FOS, HSPH1, LTF, ASF1B, TOP2A, MYC, HELLS, HSPA8, TRIP13, HSPA9, EGR1, CDK1, TNXB, HSP90AA1, PBK, UBE2C, MCM5, RAD51, CCNB1, UHRF1, CTSK, PLK1, JUN, RRM2, GADD45G, HSPD1, MELK |
| 9792  | 6.38E-04          | embryonic development ending in birth or egg hatching      | CCNB1, STIL, CCNB2, NCAPG2, SOCS3, KRT8, TTN, RAD51                                                                                                                                                                                    |
| 9893  | 7.81E-04          | positive regulation of metabolic process                   | CCNB1, LCN2, EGR1, CDK1, FOS, HMGB2, HSP90AA1, JUN, TPX2, TOP2A, MYC                                                                                                                                                                   |
| 45321 | 8.03E-04          | leukocyte activation                                       | EGR1, GADD45G, SNCA, FCER1G, HSPD1, HELLS                                                                                                                                                                                              |
| 51094 | 1.01E-03          | positive regulation of developmental process               | CCNB1, CDK1, HSP90AA1, SOCS3, JUN, MYC, RAD51                                                                                                                                                                                          |
| 48513 | 1.04E-03          | organ development                                          | EGR1, XDH, STIL, CDK1, HMGB2, SOCS3, CCNF, TTN, TACC3, CCNB2, JUN, KRT8, GADD45G, MYC, HELLS                                                                                                                                           |
| 8283  | 1.22E-03          | cell proliferation                                         | UHRF1, MKI67, NCAPG2, RACGAP1, TACC3, HELLS                                                                                                                                                                                            |
| 2682  | 1.29E-03          | regulation of immune system process                        | HSP90AA1, JUN, SNCA, CLEC2D, FCER1G, HSPD1, HSPA1B                                                                                                                                                                                     |
| 70887 | 1.30E-03          | cellular response to chemical stimulus                     | LCN2, EGR1, S100A9, SNCA, FCER1G, MYC                                                                                                                                                                                                  |
| 1775  | 1.32E-03          | cell activation                                            | EGR1, GADD45G, SNCA, FCER1G, HSPD1, HELLS                                                                                                                                                                                              |
| 226   | 1.35E-03          | microtubule cytoskeleton organization                      | NUF2, TPX2, BIRC5, TACC3                                                                                                                                                                                                               |
| 51240 | 1.37E-03          | positive regulation of multicellular organismal process    | CCNB1, CDK1, SNCA, FCER1G, HSPD1, MYC                                                                                                                                                                                                  |
| 10604 | 1.44E-03          | positive regulation of macromolecule metabolic process     | CCNB1, LCN2, EGR1, CDK1, FOS, HMGB2, JUN, TPX2, TOP2A, MYC                                                                                                                                                                             |
| 51173 | 1.49E-03          | positive regulation of nitrogen compound metabolic process | CCNB1, EGR1, CDK1, FOS, HMGB2, HSP90AA1, JUN, TOP2A, MYC                                                                                                                                                                               |

Table continues to the next page.

| <b>GO-ID</b> | <b>corrected p-value</b> | <b>Description</b>                                        | <b>Genes in test set</b>                                                                                                      |
|--------------|--------------------------|-----------------------------------------------------------|-------------------------------------------------------------------------------------------------------------------------------|
| 7346         | 1.49E-03                 | regulation of mitotic cell cycle                          | CDK1, MAD2L1, TPX2, MYC                                                                                                       |
| 8284         | 1.49E-03                 | positive regulation of cell proliferation                 | CCNB1, CDK1, RRM2, JUN, CDC20, MYC, ALDH3A1                                                                                   |
| 1933         | 1.53E-03                 | negative regulation of protein amino acid phosphorylation | CCNB1, JUN, SNCA                                                                                                              |
| 9628         | 1.53E-03                 | response to abiotic stimulus                              | KRT8, HSPB1, HSPA1B, PMAIP1, MYC, RAD51                                                                                       |
| 1932         | 1.72E-03                 | regulation of protein amino acid phosphorylation          | CCNB1, TNXB, SOCS3, JUN, SNCA                                                                                                 |
| 31325        | 1.72E-03                 | positive regulation of cellular metabolic process         | CCNB1, EGR1, CDK1, FOS, HMGB2, HSP90AA1, JUN, TPX2, TOP2A, MYC                                                                |
| 43065        | 1.92E-03                 | positive regulation of apoptosis                          | BID, STEAP3, JUN, ZBTB16, PMAIP1, MYC                                                                                         |
| 45595        | 1.98E-03                 | regulation of cell differentiation                        | XDH, HSP90AA1, SOCS3, LGALS1, JUN, CLEC2D, CDC20, RAD51                                                                       |
| 43068        | 1.99E-03                 | positive regulation of programmed cell death              | BID, STEAP3, JUN, ZBTB16, PMAIP1, MYC                                                                                         |
| 7127         | 1.99E-03                 | meiosis I                                                 | CKS2, TRIP13, RAD51                                                                                                           |
| 2376         | 1.99E-03                 | immune system process                                     | EGR1, CCNB2, GADD45G, S100A9, SNCA, FCER1G, HSPD1, TACC3, HELLS                                                               |
| 6974         | 2.05E-03                 | response to DNA damage stimulus                           | CDK1, UHRF1, HSPA1B, PMAIP1, TRIP13, RAD51                                                                                    |
| 31328        | 2.06E-03                 | positive regulation of cellular biosynthetic process      | EGR1, CDK1, FOS, HMGB2, HSP90AA1, JUN, TPX2, TOP2A, MYC                                                                       |
| 48610        | 2.11E-03                 | reproductive cellular process                             | CCNB1, HMGB2, TPX2, ZBTB16, TRIP13                                                                                            |
| 10942        | 2.11E-03                 | positive regulation of cell death                         | BID, STEAP3, JUN, ZBTB16, PMAIP1, MYC                                                                                         |
| 9891         | 2.25E-03                 | positive regulation of biosynthetic process               | EGR1, CDK1, FOS, HMGB2, HSP90AA1, JUN, TPX2, TOP2A, MYC                                                                       |
| 51246        | 2.38E-03                 | regulation of protein metabolic process                   | CCNB1, TNXB, SOCS3, JUN, SNCA, TPX2, UBE2C                                                                                    |
| 31323        | 2.44E-03                 | regulation of cellular metabolic process                  | EGR1, CDK1, HMGB2, TNXB, HSP90AA1, SOCS3, SNCA, TPX2, ZBTB16, MCM5, CCNB1, FOS, UHRF1, JUN, GADD45G, ASF1B, MYC, TOP2A, HELLS |
| 48477        | 2.50E-03                 | oogenesis                                                 | CCNB1, TPX2, TRIP13                                                                                                           |
| 32504        | 2.54E-03                 | multicellular organism reproduction                       | CCNB1, XDH, HMGB2, TPX2, ZBTB16, RACGAP1, TRIP13                                                                              |
| 48609        | 2.54E-03                 | reproductive process in a multicellular organism          | CCNB1, XDH, HMGB2, TPX2, ZBTB16, RACGAP1, TRIP13                                                                              |
| 6461         | 2.54E-03                 | protein complex assembly                                  | CCNB1, LCN2, CDK1, RRM2, TUBA4A, MYC                                                                                          |
| 70271        | 2.54E-03                 | protein complex biogenesis                                | CCNB1, LCN2, CDK1, RRM2, TUBA4A, MYC                                                                                          |
| 51054        | 2.57E-03                 | positive regulation of DNA metabolic process              | CDK1, HMGB2, JUN                                                                                                              |
| 44267        | 2.66E-03                 | cellular protein metabolic process                        | CDK1, HSP90AA1, FKBP5, AURKA, PBK, UBE2C, CCNB1, HSPH1, PLK1, GADD45G, HSPD1, MELK, HSPA8, HSPA9                              |
| 7131         | 2.81E-03                 | reciprocal meiotic recombination                          | TRIP13, RAD51                                                                                                                 |
| 60045        | 2.81E-03                 | positive regulation of cardiac muscle cell proliferation  | CCNB1, CDK1                                                                                                                   |
| 19538        | 3.18E-03                 | protein metabolic process                                 | CDK1, HSP90AA1, FKBP5, AURKA, PBK, UBE2C, CCNB1, HSPH1, CTSK, PLK1, GADD45G, HSPD1, MYC, MELK, HSPA8, HSPA9                   |

Table continues to the next page.

| GO-ID | corrected p-value | Description                                                                                  | Genes in test set                                                                                                 |
|-------|-------------------|----------------------------------------------------------------------------------------------|-------------------------------------------------------------------------------------------------------------------|
| 9607  | 3.18E-03          | response to biotic stimulus                                                                  | LCN2, HSP90AA1, KRT8, FCER1G, HSPD1, HSPA1B                                                                       |
| 31497 | 3.39E-03          | chromatin assembly                                                                           | CENPA, ASF1B, HELLS                                                                                               |
| 65008 | 3.39E-03          | regulation of biological quality                                                             | XDH, BID, EGR1, APLNR, CTSK, CCNB2, JUN, SNCA, NUF2, LTF, HSPA1B, TACC3                                           |
| 16310 | 3.51E-03          | phosphorylation                                                                              | CCNB1, CDK1, PLK1, GADD45G, SNCA, AURKA, PBK, MELK, TK1                                                           |
| 80090 | 3.61E-03          | regulation of primary metabolic process                                                      | EGR1, CDK1, HMGB2, TNXB, SOCS3, SNCA, TPX2, ZBTB16, UBE2C, MCM5, CCNB1, FOS, UHRF1, JUN, ASF1B, MYC, TOP2A, HELLS |
| 31399 | 3.76E-03          | regulation of protein modification process                                                   | CCNB1, TNXB, SOCS3, JUN, SNCA                                                                                     |
| 65004 | 3.92E-03          | protein-DNA complex assembly                                                                 | CENPA, ASF1B, HELLS                                                                                               |
| 10628 | 3.92E-03          | positive regulation of gene expression                                                       | LCN2, EGR1, CDK1, FOS, HMGB2, JUN, TOP2A, MYC                                                                     |
| 51254 | 3.92E-03          | positive regulation of RNA metabolic process                                                 | CCNB1, EGR1, FOS, HMGB2, JUN, TOP2A, MYC                                                                          |
| 33209 | 3.94E-03          | tumor necrosis factor-mediated signaling pathway                                             | KRT18, KRT8                                                                                                       |
| 42326 | 4.04E-03          | negative regulation of phosphorylation                                                       | CCNB1, JUN, SNCA                                                                                                  |
| 7276  | 4.04E-03          | gamete generation                                                                            | CCNB1, HMGB2, TPX2, ZBTB16, RACGAP1, TRIP13                                                                       |
| 9605  | 4.18E-03          | response to external stimulus                                                                | FOS, S100A8, JUN, S100A9, FCER1G, MYC                                                                             |
| 31400 | 4.18E-03          | negative regulation of protein modification process                                          | CCNB1, JUN, SNCA                                                                                                  |
| 45935 | 4.47E-03          | positive regulation of nucleobase, nucleoside, nucleotide and nucleic acid metabolic process | CCNB1, EGR1, CDK1, FOS, HMGB2, JUN, TOP2A, MYC                                                                    |
| 45936 | 4.57E-03          | negative regulation of phosphate metabolic process                                           | CCNB1, JUN, SNCA                                                                                                  |
| 10563 | 4.57E-03          | negative regulation of phosphorus metabolic process                                          | CCNB1, JUN, SNCA                                                                                                  |
| 32268 | 5.00E-03          | regulation of cellular protein metabolic process                                             | CCNB1, TNXB, SOCS3, JUN, SNCA, TPX2                                                                               |
| 60706 | 5.19E-03          | cell differentiation involved in embryonic placenta development                              | SOCS3, KRT8                                                                                                       |
| 45214 | 5.19E-03          | sarcomere organization                                                                       | KRT8, TTN                                                                                                         |
| 43524 | 5.19E-03          | negative regulation of neuron apoptosis                                                      | SNCA, BIRC5, RAD51                                                                                                |
| 10557 | 5.37E-03          | positive regulation of macromolecule biosynthetic process                                    | EGR1, CDK1, FOS, HMGB2, JUN, TPX2, TOP2A, MYC                                                                     |
| 42325 | 5.73E-03          | regulation of phosphorylation                                                                | CCNB1, TNXB, SOCS3, JUN, GADD45G, SNCA                                                                            |
| 55021 | 5.73E-03          | regulation of cardiac muscle tissue growth                                                   | CCNB1, CDK1                                                                                                       |
| 55024 | 5.73E-03          | regulation of cardiac muscle tissue development                                              | CCNB1, CDK1                                                                                                       |
| 10165 | 5.73E-03          | response to X-ray                                                                            | PMAIP1, RAD51                                                                                                     |
| 60043 | 5.73E-03          | regulation of cardiac muscle cell proliferation                                              | CCNB1, CDK1                                                                                                       |
| 1556  | 5.73E-03          | oocyte maturation                                                                            | CCNB1, TRIP13                                                                                                     |
| 9889  | 5.85E-03          | regulation of biosynthetic process                                                           | EGR1, CDK1, HMGB2, HSP90AA1, SNCA, S100A9, TPX2, ZBTB16, MCM5, FOS, UHRF1, JUN, ASF1B, MYC, TOP2A, HELLS          |
| 7292  | 5.96E-03          | female gamete generation                                                                     | CCNB1, TPX2, TRIP13                                                                                               |

Table continues to the next page.

| <b>GO-ID</b> | <b>corrected p-value</b> | <b>Description</b>                                                   | <b>Genes in test set</b>                                |
|--------------|--------------------------|----------------------------------------------------------------------|---------------------------------------------------------|
| <b>7143</b>  | 6.48E-03                 | female meiosis                                                       | PLK1, TRIP13                                            |
| <b>31344</b> | 6.64E-03                 | regulation of cell projection organization                           | LCN2, HSP90AA1, LGALS1, CDC20                           |
| <b>51174</b> | 6.74E-03                 | regulation of phosphorus metabolic process                           | CCNB1, TNXB, SOCS3, JUN, GADD45G, SNCA                  |
| <b>19220</b> | 6.74E-03                 | regulation of phosphate metabolic process                            | CCNB1, TNXB, SOCS3, JUN, GADD45G, SNCA                  |
| <b>6366</b>  | 6.93E-03                 | transcription from RNA polymerase II promoter                        | FOS, JUN, MYC                                           |
| <b>19953</b> | 7.02E-03                 | sexual reproduction                                                  | CCNB1, HMGB2, TPX2, ZBTB16, RACGAP1, TRIP13             |
| <b>60420</b> | 7.08E-03                 | regulation of heart growth                                           | CCNB1, CDK1                                             |
| <b>45453</b> | 7.08E-03                 | bone resorption                                                      | XDH, CTSK                                               |
| <b>7283</b>  | 7.28E-03                 | spermatogenesis                                                      | HMGB2, TPX2, ZBTB16, RACGAP1, TRIP13                    |
| <b>48232</b> | 7.28E-03                 | male gamete generation                                               | HMGB2, TPX2, ZBTB16, RACGAP1, TRIP13                    |
| <b>34622</b> | 7.66E-03                 | cellular macromolecular complex assembly                             | CENPA, TUBA4A, ASF1B, HELLS                             |
| <b>6333</b>  | 8.56E-03                 | chromatin assembly or disassembly                                    | CENPA, ASF1B, HELLS                                     |
| <b>7051</b>  | 8.73E-03                 | spindle organization                                                 | TPX2, TACC3                                             |
| <b>2706</b>  | 8.75E-03                 | regulation of lymphocyte mediated immunity                           | CLEC2D, FCER1G, HSPA1B                                  |
| <b>51052</b> | 8.75E-03                 | regulation of DNA metabolic process                                  | CDK1, HMGB2, JUN                                        |
| <b>3006</b>  | 8.82E-03                 | reproductive developmental process                                   | CCNB1, HMGB2, TPX2, ZBTB16, TRIP13                      |
| <b>45944</b> | 8.82E-03                 | positive regulation of transcription from RNA polymerase II promoter | EGR1, FOS, HMGB2, JUN, TOP2A, MYC                       |
| <b>7093</b>  | 9.47E-03                 | mitotic cell cycle checkpoint                                        | CDK1, MAD2L1                                            |
| <b>8104</b>  | 9.51E-03                 | protein localization                                                 | BID, STEAP3, NUF2, ZBTB16, PMAIP1, TACC3, KIF20A, HSPA9 |
